# Supplementary material for: The Effect of Exogenous Sex Steroids on the Vaginal Microbiota: A Systematic Review
Source: PubMed Central journal article supplement (PMC8633117; doi:10.3389/fcimb.2021.732423), 2021-11-12
Supplement: DataSheet_1.pdf [file DataSheet_1.pdf]

Supplementary Table 1. Eligibility criteria for inclusion in the systematic review

---

**Eligibility criteria for inclusion in systematic review**

---

*Study type*

- cross-sectional
- cohorts
- randomised controlled trials

*Population type*

- reproductive-aged women (not currently pregnant)
- post-menopausal women

*Sex steroid type reported on*

- hormonal contraceptives stratified by
  - oestrogen-containing hormonal contraception
  - progestin-only contraception
- menopausal hormone therapy

*Molecular methods employed*

- quantitative polymerase chain reaction (qPCR)
- 16S microarray
- next-generation sequencing
- Sanger sequencing

*Study outcome: reported on a measure of one/more of the following*

- composition of the vaginal microbiota (one or more species)
  - stability of the vaginal microbiota
  - diversity of the vaginal microbiota
-

Supplementary Table 2. Bias Assessment Tool

|                                                  |                                                                                                     |                                                                                                                      |            |
|--------------------------------------------------|-----------------------------------------------------------------------------------------------------|----------------------------------------------------------------------------------------------------------------------|------------|
| <b>Selection Bias</b>                            | Was the recruited population representative of the general population? E.g. age etc                 | Yes (low risk) – population was clearly representative                                                               | 0          |
|                                                  |                                                                                                     | No (high risk) - population was clearly not representative                                                           | 1          |
|                                                  | Were participants randomly allocated? If self-selected treatment, were they consecutively enrolled? | Yes (low risk) – Patients randomly allocated treatment                                                               | 0          |
|                                                  |                                                                                                     | No (medium risk) – Not randomised, but sequentially enrolled                                                         | 1          |
|                                                  |                                                                                                     | No (high risk) – Patients self-selected their treatment                                                              | 2          |
| <b>Sample Size</b>                               | Was the sample size adequate to supporting findings?                                                | Yes (low risk) - Large number of participants sampled (n>100)                                                        | 0          |
|                                                  |                                                                                                     | Yes (low risk) – Sample size calculations shown and met                                                              | 0          |
|                                                  |                                                                                                     | No (high risk) – Low number of participants                                                                          | 1          |
| <b>Measurement Bias</b>                          | Were appropriate controls present?                                                                  | Yes (low risk)- Women not using HC/MHT                                                                               | 0          |
|                                                  |                                                                                                     | Yes (low/medium risk) – Participant baseline specimen as a comparator                                                | 1          |
|                                                  |                                                                                                     | No (high risk) – No Controls                                                                                         | 2          |
|                                                  |                                                                                                     | No (high risk) - Cu-IUD as a comparator (HC studies ONLY) OR women without PM symptoms not on MHT (MHT studies ONLY) | 2          |
|                                                  | Were the analyses stratified by the HC taken?                                                       | Yes (low) – Clearly stratified by oestrogen-containing and progestin-only                                            | 0          |
|                                                  |                                                                                                     | N/A MHT study with no stratification needed                                                                          | 0          |
|                                                  |                                                                                                     | No (high) – Unclear whether combined or progestin-only                                                               | 1          |
|                                                  | Adjusted for confounding variables?                                                                 | Yes (low risk) – Adjusted for confounding variables                                                                  | 0          |
|                                                  |                                                                                                     | No (high risk) – No adjusting for confounding variables                                                              | 1          |
| <b>Summary of the overall risk of study bias</b> |                                                                                                     | Low Risk                                                                                                             | <b>0-2</b> |
|                                                  |                                                                                                     | Moderate Risk                                                                                                        | <b>4-6</b> |
|                                                  |                                                                                                     | High Risk                                                                                                            | <b>7-8</b> |

Abbreviation: HC, hormonal contraception; MHT, menopausal hormone therapy; Cu-IUD, copper

Supplementary Table 3. Summary of study populations, design, locations and methods

| Study Groups                              | Study Population |              |
|-------------------------------------------|------------------|--------------|
|                                           | HC               | HRT          |
| 1. Reproductive aged women                |                  |              |
| 1a. Reproductive aged HIV negative women  | 20               | -            |
| 1b. HIV or HIV/HPV positive women         | 2                | -            |
| 1c. Women with BV                         | 1                | -            |
| 1d. Sex workers (no other risk factors)   | 2                | -            |
| 2. Post-menopausal women                  | -                | 4            |
| <b>Study Design</b>                       |                  |              |
| Cross-sectional                           | 9                | 1            |
| Longitudinal                              | 16               | 3            |
| Study duration, median weeks (range)      | 31 (1 to 104)    | 10 (4 to 13) |
| <b>Study Region (Defined by WHO)</b>      |                  |              |
| East Asia and Pacific <sup>a</sup>        | 1                | 1            |
| Europe and Central Asia                   | 2                | 0            |
| Latin America and Caribbean               | 2                | 0            |
| Middle East and North Africa <sup>a</sup> | 0                | 3            |
| North America                             | 8                | 0            |
| South Asia                                | 0                | 0            |
| Sub-Saharan Africa                        | 12               | 0            |
| <b>Molecular Methods</b>                  |                  |              |
| NGS                                       | 19               | 1            |
| qPCR                                      | 4                | 0            |
| Microarray <sup>b</sup>                   | 2                | 1            |
| Sanger Sequencing <sup>b</sup>            | 0                | 3            |

Abbreviations: HC, hormonal contraception; MHT, menopausal hormone therapy; HIV, Human immunodeficiency virus; HPV, Human papilloma virus; BV, Bacterial vaginosis; NGS, Next-generation sequencing; qPCR, quantitative PCR; DGGE, Denaturing gradient gel Electrophoresis
